# Supplementary material
Source: PubMed Central journal article supplement (PMC3746092)
Supplement: 97320630009710S1.pdf [file 97320630009710S1.pdf]

## Supplementary material:

**Table 1:** List of *Accacia nilotica* phytochemicals with docking S-Score

| Sr. No. | Compounds                     | Score (S) |
|---------|-------------------------------|-----------|
| 1       | 3',7-Di-O-galloylecatechin    | -15.4854  |
| 2       | 4',5-Di-O-galloylecatechin    | -14.7724  |
| 3       | 1,3-Digalloylglucose          | -14.7378  |
| 4       | 4',7-Di-O-galloylgalocatechin | -14.5364  |
| 5       | 1,6-Digalloylglucose          | -14.3380  |
| 6       | 5-O-Galloylecatechin          | -14.3360  |
| 7       | 7-O-Galloylecatechin          | -14.2951  |
| 8       | 7-O-Galloylgalocatechin       | -14.2594  |
| 9       | 4',7-Di-O-galloylecatechin    | -14.1188  |
| 10      | 7-O-Galloylepigallocatechin   | -14.0773  |
